# Supplementary material for: Efficient and persistent cold cathode emission from CuPc nanotubes: a joint experimental and simulation investigation
Source: Royal Society of Chemistry journal article supplement (doi:10.1039/c4dt00300d), 2014-01-01
Supplement: c4dt00300d1.pdf [file c4dt00300d1.pdf]

## **Supporting Information**

### **Efficient and persistent cold cathode emission from CuPc nanotubes: A joint experimental and simulation investigation**

Uttam Kumar Ghorai<sup>1</sup>, Swati Das<sup>2</sup>, Subhajit Saha<sup>1</sup>, Nilesh Mazumder<sup>2</sup>, Dipayan Sen<sup>2</sup> and  
Kalyan K. Chattopadhyay<sup>1,2\*</sup>

<sup>1</sup>School of Materials Science and Nanotechnology, Jadavpur University, Kolkata 700 032,  
India

<sup>2</sup>Thin Film & Nanoscience Laboratory, Department of Physics, Jadavpur University, Kolkata  
700 032, India

## **Content**

1. XRD pattern and FESEM image of CuPc nanotube
2. UV-Vis spectra of CuPc nanorods and nanotubes

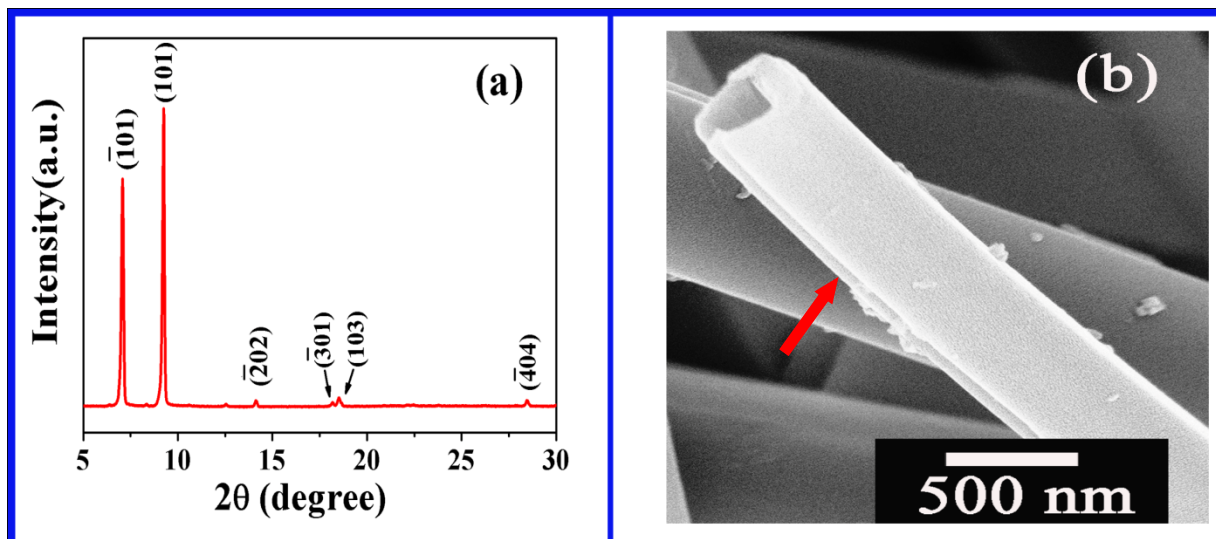

**Figure S1.** (a) XRD pattern of CuPc nanotubes (b) FESEM image of CuPc nanotube and the arrow indicates that the half-tubular structures transform to single tube by joining their edges.

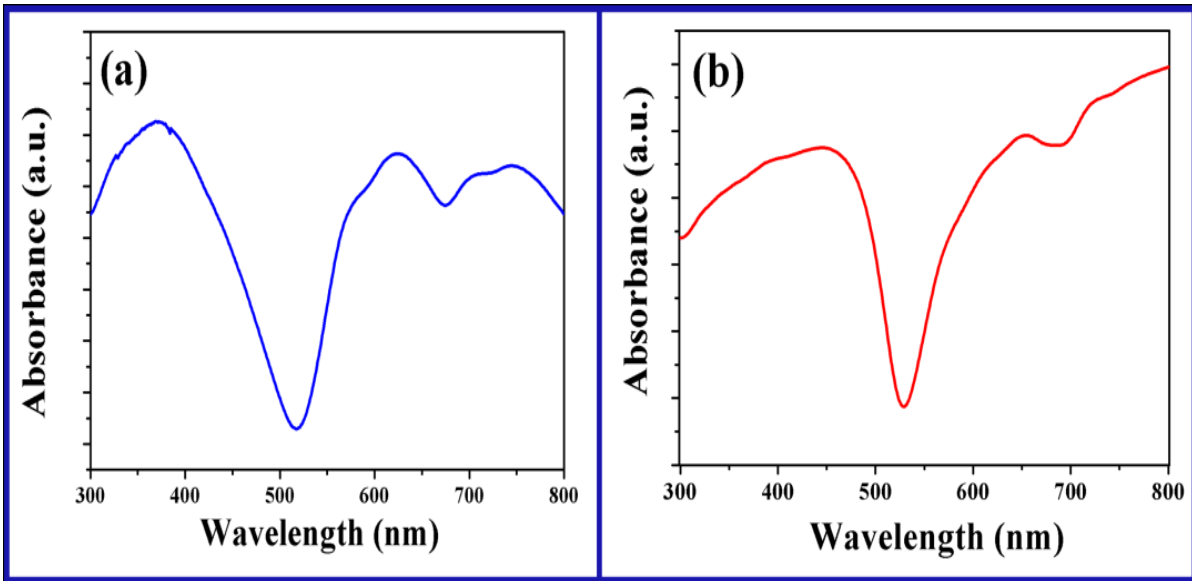

**Figure S2.** (a) & (b) UV-Vis spectra of CuPc nanorods and nanotubes clearly showing the Davydov splitting
